1 **Leveraging biological insight and environmental variation to improve phenotypic**  
2 **prediction: Integrating crop growth models (CGM) with whole genome prediction (WGP)**

3 C.D Messina<sup>\*1</sup>, F. Technow<sup>2</sup>, T. Tang<sup>1</sup>, R. Totir<sup>1</sup>, C. Gho<sup>3</sup>, M. Cooper<sup>1</sup>

4

5 <sup>1</sup>DuPont Pioneer, 8503 NW 62nd Avenue, Johnston, IA 50131, USA.

6 <sup>2</sup>DuPont Pioneer, 596779 County Road 59N, Woodstock, Ontario N4S 7W1, Canada.

7 <sup>3</sup>DuPont Pioneer, Semillas Pioneer Chile Ltda, Santa Filomena 1609 – Buin, PO Box 267, Chile.

8

9 \*Corresponding author:

10 DuPont Pioneer

11 8503 NW 62<sup>nd</sup> Ave.

12 Johnston, IA 50131

13 USA

14 [charlie.messina@pioneer.com](mailto:charlie.messina@pioneer.com)

15

16

17

18 **Keywords:** whole genome prediction, crop growth model, maize, breeding, physiology, genotype

19 by environment interactions, phenomics, phenotyping

20 **Abstract**

21 A successful strategy for prediction of crop yield that accounts for the effects of genotype and  
22 environment will open up many opportunities for enhancing the productivity of agricultural  
23 systems. Crop growth models (CGMs) have a history of application for crop management  
24 decision support. Recently whole genome prediction (WGP) methodologies have been developed  
25 and applied in breeding to enable prediction of crop traits for new genotypes and thus increase the  
26 size of plant breeding programs without the need to expand expensive field testing. The presence  
27 of Genotype-by-Environment-by-Management ( $G \times E \times M$ ) interactions for yield presents a  
28 significant challenge for the development of prediction technologies for both product  
29 development by breeding and product placement within agricultural production systems. The  
30 integration of a CGM into the algorithm for whole genome prediction WGP, referred to as CGM-  
31 WGP, has opened up the potential for prediction of  $G \times E \times M$  interactions for breeding and product  
32 placement applications. Here a combination of simulation and empirical studies are used to  
33 explain how the CGM-WGP methodology works and to demonstrate successful reduction to  
34 practice for applications to maize breeding and product placement recommendation in the US  
35 corn belt.

36

## 37 **1. Introduction**

38 Whole Genome Prediction (WGP) is a set of quantitative genetic methodologies that  
39 enables prediction of the breeding value of an individual, created from one or more reference  
40 populations, based on its genetic makeup and pedigree relations. In combination with high  
41 throughput genotyping and phenotyping WGP has brought unprecedented change to the scale of  
42 plant breeding (Heffner et al., 2009; Lorenz et al., 2011; Cooper et al., 2014). Unlike the near  
43 past, today for most large commercial breeding programs germplasm is evaluated using WGP and  
44 only a fraction of the new hybrids that can be created are evaluated in multi-environment trials  
45 (MET, Heffner et al., 2009; Cooper et al., 2014). WGP enabled breeders to increase the effective  
46 size of their breeding programs without the need to increase the scale of field phenotyping and by  
47 doing so accelerated the rate of genetic gain.

48 The WGP methodology seeks to simultaneously estimate the allelic values at all available  
49 polymorphic marker loci across the genome (Meuwissen et al., 2001). Bayesian approaches seek  
50 to estimate the posterior distribution of marker effects by means of calculation of a likelihood  
51 function and a prior distribution of such effects. This is a data driven process that leverages the  
52 availability of large datasets routinely generated in commercial breeding programs. Datasets often  
53 comprise multiple years and large samples of genotypes from reference populations with the  
54 expectation that these are a representative sample of the germplasm and the target population of  
55 environments (TPE, Cooper et al., 2014). The mechanics of the method separates individuals  
56 within populations under selection into the WGP estimation set, individuals in this set have both  
57 phenotypic and genotypic information, and the prediction set, individuals in this set only have  
58 genotypic information (see Heffner et al., 2009, Lorenz et al., 2011). Various statistical  
59 methodologies were developed to enable WGP, among which selection of a suitable method  
60 depends on genetic architecture of the trait, the ability to demonstrate and model non-linear  
61 interactions and the population structure (Lorenz et al., 2011). Recently, the use of biological

62 frameworks to model non-linear genetic effects was advocated to improve prediction accuracy  
63 (Marjoram et al., 2014, Technow et al., 2015). A necessary condition to leverage such biological  
64 insight in WGP is that that knowledge be encapsulated in the form of quantitative functions that  
65 transparently map markers to biological function (Messina et al., 2011; Cooper et al., 2005) and  
66 be linked to prediction algorithms (Technow et al., 2015) to generate the necessary boundary  
67 conditions to accurately execute the biological algorithms (Cooper et al., 2016).

68 Crop Growth Models (CGMs), structured on principles of resource capture (e.g., solar  
69 radiation, water, nitrogen), use efficiency and allocation to organs of economic value, provide the  
70 biological framework for phenotypic prediction of relevant quantitative traits for breeding  
71 (Cooper et al., 2009). A general mathematical framework to develop models for phenotypic  
72 prediction with genetic information based on the E(N:K) family of models (Cooper et al., 2005)  
73 has been developed (Messina et al., 2011). Examples of implementations include models of leaf  
74 elongation rate and flowering time in maize (Welcker et al., 2007; Dong et al., 2012), and oat and  
75 soybean growth and development (Yin et al., 2004; Messina et al., 2006). But the  
76 parameterization of CGMs at a scale that is required to support breeding programs using these  
77 approaches proved challenging because of the difficulty of phenotyping important physiological  
78 traits (Messina et al., 2011). This phenotyping bottleneck currently limits the applicability of  
79 CGM to augment plant breeding. Advances in phenomics will undoubtedly generate very large  
80 datasets (Furbank and Tester, 2011; Fahlgren et al., 2015) bringing opportunity to improve  
81 models, and challenges to the utilization of these sources of information. Efficient analytical  
82 methods that reduce the phenotyping requirements and directly integrate biological models, such  
83 as CGMs, into the prediction algorithms in a single step, are naturally well positioned to fully  
84 take advantage of improvements in phenomics.

85 The CGM-WGP methodology uses a CGM as part of the calculation of the likelihood  
86 function step in an otherwise standard WGP algorithm (Technow et al., 2015). The relationship

87 between marker effects and yield is established through the estimation of marker effects and  
88 biological parameters within the CGM. Because the selected genetic models result in the  
89 modulation of the strength of the relationship between the environment and a physiological  
90 process, and/or different physiological processes, genotype-by-environment (G×E), epistasis in  
91 the form of trait-by-trait genotype-by-genotype (G×G) and genotype-by-environment-by-  
92 management (G×E×M) interactions are all emergent properties from the genetic variation effects  
93 in the functional equations that relate traits and the environment (Messina et al., 2011; Cooper et  
94 al., 2009). Technow et al (2015) demonstrated this concept using a simulation experiment, while  
95 Cooper et al. (2016) demonstrated the feasibility of implementing CGM-WGP within a functional  
96 breeding program. However, a demonstration that CGM-WGP prediction accuracy is higher than  
97 benchmark methodologies in at least one realistic breeding case study is lacking. It was  
98 hypothesized that the difference in predictive accuracy between CGM-WGP and benchmark  
99 WGP algorithms will increase with an increasing role of G×E interaction in determination of  
100 performance, and that parameterization of the CGM-WGP models will improve with the contrast  
101 between environmental conditions (Cooper et al., 2016).

102 Because training of CGM-WGP involves the estimation of biological parameters that  
103 regulate physiological behavior, the CGM-WGP not only can output predictions for yield for the  
104 set of environments and hybrids used for training as for other prediction methods such as BayesA,  
105 but also enables the breeder to exercise the CGM to make predictions to evaluate hybrids that  
106 have never been empirically evaluated in the field at a large scale, through computer simulation.  
107 This simulation step enables extending predictions from a few G×M or G×E cases intrinsic to the  
108 training sets to virtually the target population of environments, here considered broadly to include  
109 agronomic practices.

110 The objectives of this paper are to: 1) extend CGM-WGP methodology to train models  
111 using data from multiple environments, 2) evaluate, using both synthetic and experimental data

112 from a maize drought breeding program, whether CGM-WGP methodology can enable improved  
113 phenotypic prediction when G×E interactions are an important determinant of performance, 3)  
114 demonstrate virtual breeding by means of use of CGM-WGP and computer simulation, and 4)  
115 facilitate the dialogue between breeders, crop physiologists and modelers.

116

## 117 **2. Materials and Methods**

### 118 *2.1 Hierarchical model*

119 The model fitted to the data (Fig. 1) uses the likelihood derived from the generalized  
120 E(N:K) model (Cooper et al., 2005; Messina et al. 2011) as,

$$121 \quad y_{ij} \sim N\left(\text{CGM}(T_{ti}, E_j), \sigma_{e_j}^2\right)$$

122 where  $y_{ij}$  is the yield of individual  $i$  in environment  $j$ , and  $T_{ti}$  is the unobserved value for  
123 physiological trait  $t$  (e.g., AMAX; a measure of maize canopy size based on the area of the  
124 largest leaf) for individual  $i$ . The environmental inputs (e.g., soil type, temperature) of  
125 environment  $j$  are represented by  $E_j$ , and  $\sigma_{e_j}^2$  denotes the residual variance for yield in that  
126 environment. Finally  $N$  denotes the Gaussian density function and  $\text{CGM}$  the crop growth model.  
127 Thus,  $\text{CGM}(T_{ti}, E_j)$  denotes the simulated yield of individual  $i$  in environment  $j$ , as determined  
128 by the states of the physiological traits  $t$  for individual  $i$ ,  $T_{ti}$ .

129 The prior for the unobserved  $T_{ti}$  was

$$T_{ti} \sim N\left(\beta_{o_t} + \sum_k z_{tik} u_{tk}, \sigma_{T_t}^2\right)$$

130 where  $\beta_{o_t}$  is a trait specific intercept,  $z_{tik}$  denotes the marker score of individual  $i$  at marker  $k$  for  
131 trait  $t$  and  $u_{tk}$  the effect of marker  $k$  for trait  $t$ . The trait specific prior variance was  $\sigma_{T_t}^2$ .

132 The prior distributions for the marker effects correspond to those from the widely used  
133 whole genome prediction model ‘BayesA’ (Meuwissen et al., 2001). Briefly, the marker effects  
134  $u_{tk}$  were associated with a Normal prior distribution with mean 0 and marker specific  
135 variance  $\sigma_{tk}^2$ , which itself was associated with scaled inverse Chi-square prior distribution with  
136 4.001 degrees of freedom and trait specific scaling factor  $S_t^2$ . The prior distribution for the  
137 parameter  $S_t^2$  was a Gamma distribution with constant parameters (Yang and Tempelman, 2012).  
138 The prior for the trait specific intercept  $\beta_{o_t}$  was a Normal distribution with mean  $\mu_{o_t}$  and  
139 variance  $\sigma_{o_t}^2$ , both of which were constants. The prior of  $\sigma_{T_t}^2$  was again a scaled inverse Chi  
140 square distribution with 4.001 degrees of freedom and constant scaling factor  $S_{T_t}^2$ . Finally, the  
141 prior of the environment specific residual variance  $\sigma_{e_j}^2$  was also a scaled inverse chi-square  
142 distribution with 4.001 degrees of freedom and constant scaling factor  $S_{e_j}^2$ . Thus, the CGM-WGP  
143 model can be understood as a generalized linear model version of the whole genome prediction  
144 model ‘BayesA’ (Meuwissen et al., 2001), in which the crop growth model acts as the link  
145 function.

146 The constants were derived from rough prior estimates of the mean ( $m_t$ ) and variance  
147 ( $v_t$ ) of physiological trait  $t$  within the germplasm under consideration. From these, the scaling  
148 factor of the prior of the physiological traits was calculated as  $S_{T_t}^2 = v_t \cdot (4.001 - 2)/4.001$ ,  
149 which results in a scaled inverse chi-square prior distribution with mean  $v_t$ . The prior parameters  
150 for the trait specific intercepts  $\beta_{o_t}$  were  $\mu_{o_t} = m_t$  and  $\sigma_{o_t}^2 = v_t$ . The parameters of the Gamma  
151 prior distribution of  $S_t^2$ , the scaling factor of the marker specific variances, were calculated as  
152 follows. First the variance of the additive effect of a random marker locus was calculated

153 according to Habier et al. (2011) as  $v_{u_t} = v_t / \sum_k 2p_k(1 - p_k)$ , where  $p_k$  is the allele frequency  
154 of marker  $k$ . From this we calculated the prior expected value of  $S_t^2$  as  $E[S_t^2] = v_{u_t} \cdot (4.001 -$   
155  $2)/4.001$ , the values of  $shape_t$  and  $rate_t$  were then chosen in such a way that the mean of the  
156 Gamma prior distribution was  $E[S_t^2]$  and its variance  $\left(\frac{E[S_t^2]}{3}\right)^2$ .

157

## 158 *2.2 Metropolis-within-Gibbs sampling algorithm*

159 A ‘Metropolis-Hastings within Gibbs’ algorithm was implemented to sample from the  
160 posterior distribution of all parameters (Gelman et al., 2004; see Wallach et al., (2012) for an  
161 application to estimating crop growth model parameters). Briefly, the Gibbs sampler (Gelman et  
162 al., 2004) is a Markov chain algorithm for high-dimensional parameter spaces. Because the  
163 algorithm samples parameters sequentially from the conditional (on the data and all other  
164 parameters) posterior distribution of each, the algorithm is highly efficient. With the exception of  
165  $T_{ti}$ , the conditional posterior distributions of all parameters in CGM-WGP are recognizable  
166 distributions that can be sampled from directly. A Metropolis-Hastings step, which is an accept-  
167 reject algorithm that can sample from any distribution, was therefore included in the final  
168 algorithm to sample  $T_{ti}$ . The Gibbs sampler use in this study is identical to the Gibbs algorithm  
169 generally used for BayesA models (Meuwissen et al., 2001; Yang and Tempelman, 2012), except  
170 for the sampling of  $T_{ti}$  with the Metropolis-Hastings algorithm.

171 Conditional on the marker effects  $u_{tk}$ , the physiological traits  $T_{ti}$  of one individual are  
172 independent of those of the others and can hence be sampled sequentially. The different traits for  
173 each individual, however, are not and have to be sampled jointly. This was done as described by  
174 Wallach et al. (2012), with the exception that a change of variable was implemented to sample the  
175 parameters in the space of the natural logarithm. This is a common technique when the parameter



176 values in the original space have to be positive (Gelman et al., 2004). The Metropolis-Hastings  
177 step was run for two subsequent iterations to improve convergence.

178 Gibbs sampling chains were run for 200 thousand iterations. The first half of each chain  
179 was discarded as ‘burn-in’ and samples from every 100<sup>th</sup> iteration thereafter were stored, thus  
180 resulting in 1000 stored samples. Convergence was monitored by inspecting graphical  
181 diagnostics such as implemented in the R package ‘coda’ (Plummer et al., 2006). Increasing the  
182 chain length did not seem to improve prediction accuracy. The algorithm was implemented as a C  
183 routine and embedded in the R statistical software environment (R Core Team, 2014).

184

### 185 *2.3 Prediction of yield from CGM-WGP results*

186 The predicted yield of an untested individual  $i'$  in environment  $j'$  was obtained from the  
187 posterior samples of the marker effects  $u_{tk}$  and the intercepts  $\beta_{o_t}$ . From each posterior sample the  
188 values of the physiological traits were calculated as  $\tilde{T}_{ti} = \beta_{o_t} + \sum_k z_{tik} u_{tk}$ . Those values were  
189 then entered into the CGM together with the inputs of the environment, resulting in one simulated  
190 yield value per posterior sample. Those samples represent the posterior predictive distribution of  
191 yield for individual  $i'$  in environment  $j'$ . The mean of this distribution was used as the predicted  
192 value. The algorithm BayesA (Meuwissen et al., 2001) was utilized as a reference method that  
193 predicts yield using marker information only. i.e.,  $\bar{y}_i \sim N(\beta_o + \sum_k z_{ik} u_k, \sigma_e^2)$ , with  $\bar{y}_i$  denoting  
194 the yield of individual  $i$  averaged over all environments considered for estimation. The prior of  
195 the marker effects  $u_k$  was  $u_k \sim N(0, \sigma_k^2)$  and standard, uninformative prior distributions were  
196 used for  $\sigma_k^2$  and  $\sigma_e^2$ . The BayesA Gibbs-sampler was run for 50000 iterations, of which the first  
197 25000 were discarded and samples from only every 25<sup>th</sup> subsequent iteration stored. In this study,  
198 BayesA served as a purely statistical reference method relative to which we measure the benefit  
199 of modeling G×E interactions with CGM-WGP.

200

#### 201 *2.4 Crop growth model*

202 The CGM connected to the WGP algorithm is a mechanistic model based on the concept  
203 of radiation and water capture and use efficiencies, and mass allocation to reproductive growth  
204 (Muchow et al., 1990; Muchow and Sinclair, 1991). Crop and canopy development are simulated  
205 as a function of thermal time (TT, °C) with base temperature for preflowering equal to 8°C and  
206 postflowering equal to 0°C (Muchow et al., 1990). Growth (W) is calculated as the product of  
207 light interception (LI) and radiation use efficiency (RUE),  $W=LI \times RUE$ . The value for RUE was  
208 set to 1.85 g MJ<sup>-1</sup> after Hammer et al. (2009), unless explicitly changed for specific studies  
209 described below. Light interception is estimated from the leaf area per plant (LP), plant density  
210 (PD) and canopy attributes described by the coefficient of extinction, which has set to 0.4,  $LI=1-$   
211  $\exp(-0.4 \times LP \times PD)$ . Leaf area per plant is modeled solely as a function of the size of the largest  
212 leaf (AMAX, Birch et al., 1998); that is, other parameters are kept constant as in Muchow et al.  
213 (1990). Transpiration (TR) is calculated as a function of W, vapor pressure deficit (VPD),  
214 transpiration efficiency coefficient (TE=9 kPa, Tanner and Sinclair, 1983), and the expression of  
215 the limited transpiration trait (Sinclair et al., 2005; Messina et al., 2015) on an hourly (h) time  
216 step,

$$217 \quad TR_h = \frac{W_h \times BKP}{TE} + \frac{W_h \times (VPD_h - BKP) \times SF}{TE} \quad \text{if } VPD \geq BKP$$
$$TR_h = \frac{W_h \times VPD_h}{TE} \quad \text{otherwise}$$

218 where BKP is the breakpoint and SF is the sensitivity of TR to VPD. The parameter SF was set at  
219 0.3 in order to incorporate relevant functional biological behavior (Gholipoor et al., 2013;  
220 Choudhary et al., 2014; Shekoofa et al., 2015). When hourly VPD exceeds BKP, hourly growth  
221  $W_h$  is updated to conform to hourly TR and a constant TE,

$$222 \quad W_h = \frac{TR_h \times TE}{VPD_h}$$

223           Water deficit effect on growth is modeled through the coefficient water supply-to-  
224 demand (SD) ratio. Water demand is calculated as TR in the absence of soil water deficit. Water  
225 supply is estimated as the sum across all soil layers of soil water content minus the soil water  
226 content at the lower limit times the *kl* as in Robertson et al. (1993), where the *kl* coefficient was  
227 set at 0.08 (Dardanelli et al., 1997; Hammer et al., 2009). Soil water content is estimated using a  
228 multilayer model. Grain yield is simulated as the linear increase of harvest index (HI) during seed  
229 fill. Reduction in postflowering growth due to stress at flowering time is simulated by modeling  
230 the attainable HI from silk numbers exerted at the onset of the increase in HI, as defined in  
231 Muchow and Sinclair (1990), and the maximum silk numbers (SNM), a value that can vary  
232 among genotypes. Silk number (SN) is estimated from the ear mass (EM) as,  $SN = SNM \times (1 -$   
233  $\exp(-0.14 \times (EM - MEB)))$ , where MEB is a parameter characteristic of genotype (Cooper et al.,  
234 2014), and EM is modeled using an exponential function of TT and a stress factor directly  
235 proportional to SD. The parameter MEB corresponds to the threshold of ear biomass below which  
236 silk elongation is not fast enough to exert silks beyond the ear husk. Chenu et al. (2009) used a  
237 similar approximation that included a threshold similar to MEB to model the connection between  
238 QTL controlling silk elongation, anthesis-silking interval, which is a crop attribute closely related  
239 to yield under water limited conditions (Bolaños and Edmeades, 1993; Cooper et al., 2014), and  
240 yield. For further discussion of CGMs Soltani and Sinclair (2012) provide an extensive treatment  
241 of simple mechanistic crop models.

242

### 243 *2.5 Multi-environment trial simulation*

244           A multi-environment trial simulation experiment based on three environments was  
245 created to assess the CGM-WGP methodology. To characterize the three environments and

246 quantify water availability during the crop cycle, water SD ratios were calculated on a daily time  
247 step following the procedures described by Cooper et al. (2016). Consequently it was determined  
248 that the simulated multi-environment trial comprised of three environments with different degrees  
249 of water deficit occurring in Johnston, Iowa, US (41.684 °N, -93.508°W) in 1988, 2012 and  
250 2010, herein referred to as water limited 1 (WL1), water limited 2 (WL2) and NWL (not water  
251 limited), respectively. The soil depth, soil water holding capacity, and *kl* were 2.2 m, 0.13  
252 cm<sup>3</sup>.cm<sup>-3</sup>, and 0.08, respectively. Planting dates were 4/29/1988, 4/28/2010, and 5/4/2012. Plant  
253 population was set at 6.5 pl m<sup>-2</sup>. Daily meteorological records were from the National Oceanic  
254 and Atmospheric Administration (NOAA; Bell et al., 2013). Genotypic variation for a set of  
255 physiological traits was considered for a Doubled Haploid (DH) population of lines. The DH  
256 lines were evaluated as F1 hybrids in combination with an inbred from a complementary heterotic  
257 group. Parameters describing these traits for an individual DH within a population were allowed  
258 to vary within the following intervals: [700 < AMAX < 1100 cm<sup>2</sup>] (Elings, 2000), [1.6 < RUE < 2.1  
259 g MJ<sup>-1</sup>] (Sinclair and Muchow, 1999), [0.5 < MEB < 1.0 g] (Cooper et al., 2014), and  
260 [1.5 < BKP < 2.5 kPa] (Messina et al., 2015).

261 The DH genotypes of the DH lines were generated *in silico* in two step process, similar to  
262 the one used by Technow et al. (2014a) for simulating a DH maize breeding population. In step  
263 one, an ancestral population of 50 inbred lines was stochastically simulated. The genome  
264 consisted of 10 chromosomes with lengths between 0.75 and 1.25 Morgan (M). Two hundred  
265 evenly spaced biallelic marker loci were placed on each chromosome. The total number of  
266 markers was thus 2000. An additional 40 loci were randomly distributed across all chromosomes  
267 that served the purpose of simulating quantitative trait loci (QTL). Historical linkage  
268 disequilibrium (LD) between markers as well as their allele frequencies was simulated with the  
269 method described by Montana (2005). The simulated expected LD (measured as squared  
270 correlation) between markers followed an exponential decay, such that it halved approximately

271 every 0.1 Morgan. For two marker loci  $t$  Morgan apart, the expected LD followed  $0.5 \cdot$   
272  $2^{(-t/0.1)} + 0.1 \cdot 2^{(-t/0.5)}$ . Exponential decay curves mirror the LD decay curves observed in  
273 maize (Technow et al., 2014b). Minor allele frequencies were drawn at random from the (0, 0.5)  
274 interval. This population was then random mated for three generations to generate a pedigree and  
275 sub-population structure. The population size was thereby kept constant at 50. After the last  
276 generation 1000 doubled haploid lines were generated through meiosis followed by a  
277 chromosome doubling step.

278         The values for the physiological traits were simulated according to Technow et al.  
279 (2015). A unique set of ten of the 40 loci set aside as QTL were assigned to each of the four  
280 physiological traits: AMAX, RUE, MEB, and BKP. The additive substitution effect of each QTL  
281 was drawn from a Standard Normal distribution and raw genetic scores calculated for each trait  
282 by summing the effect of the QTL according to the genotypes of the DH lines. These scores were  
283 then rescaled linearly to the ranges described above.

284         The true grain yield value of a DH line  $i$  in environment  $j$  was then simulated by  
285 executing the CGM with the physiological trait values of the DH and the appropriate  
286 environmental inputs. For those DH that became part of the estimation set we also simulated  
287 observed phenotypic yield values by adding a Normal noise variable to the true values. The  
288 variance of this variable was chosen in such a way that the within environment heritability was  
289 equal to 0.66.

## 290 *2.6 Whole genome prediction application*

291         Estimation sets for training the CGM-WGP model were constructed from one, two or all  
292 three environments. For the single location estimation sets (WL1, WL2 or NWL) the phenotypic  
293 yield data of a random sample of 500 of the DH lines in that environment were used. For two and

294 three environment estimation sets, yield data from 250 DH lines in the two environments case and  
295 166 DH lines in the three environments case were used. The total number of data points was thus  
296 equal in all cases. Values for  $\hat{m}_t$  and  $\hat{v}_t$ , which are required for calculation of constants and  
297 starting values, were computed from estimates obtained from a random sample of 25 DH lines,  
298 which were assumed to be phenotyped for the traits but were not used as part of the estimation  
299 set. The CGM-WGP algorithm was then run as described and the marker effects used to predict  
300 the yield performance of all DH lines within the validation set in all three environments, also as  
301 described. Prediction accuracy was then calculated as the Pearson correlation between predicted  
302 and true yield in each environment. Because the true values of the physiological traits were  
303 known, it was possible to assess their prediction accuracy by calculating the correlation between  
304 their predicted and true values. BayesA methodology was utilized as a reference method and it is  
305 described above. The whole process, including the data simulation, was repeated 75 times for  
306 each environment combination. The resulting distribution of the accuracy statistics was  
307 summarized by the mean and standard deviation.

308

### 309 *2.7 Empirical breeding experiment*

310 For the empirical evaluation the CGM-WGP and BayesA methods prediction accuracies  
311 were compared using four DH populations that were tested in an experiment that comprised of a  
312 non-water-limited (NWL) environment and a water-limited (WL) environment. Both field  
313 environments were created at the DuPont Pioneer Viluco research station, which is located in  
314 Chile (-33.797 °S, -70.807 °W), in the 2012/13 season. The contrasting water environments were  
315 created by controlled application of quantity and timing of water during the crop cycle. As for the  
316 simulation experiment, water SD ratios were estimated on a daily time step during the crop cycle

317 for the NWL and WL environments to quantify the impact of the different irrigation regimes that  
318 were used to create the contrasting water environments.

319 The four DH populations, referred to as DHPop1, DHPop2, DHPop3, DHPop4, were  
320 created from biparental crosses between six inbred lines, referred to as I1, I2, ... , I6. The two  
321 parents of DHPop1, I1 and I2, were different from the four inbred lines, I3, I4, I5 and I6, used as  
322 parents to create the other three DH populations. One of the four remaining inbred lines, I3, was  
323 used as a common parent for all three remaining DH populations; DHPop2 parents I3/I4,  
324 DHPop3 parents I3/I5 and DHPop4 parents I3/I6. Thus, there is a closer pedigree relationship,  
325 based on the half-sib structure, between DHPop2, DHPop3 and DHPop4 than there is between  
326 any of these three populations and DHPop1. Each of the four populations was represented in the  
327 experiment by 76 to 105 DH lines. The DH lines were each genotyped with approximately 1600  
328 polymorphic Single Nucleotide Polymorphism (SNP) markers.

329 For the experimental evaluation of grain yield, testcross hybrids were created for all of  
330 the DH lines using a common inbred tester line that was selected from a complementary heterotic  
331 group. Thus, while for discussion purposes we refer to DH lines they were evaluated for grain  
332 yield as hybrids in the NWL and WL environments. Grain yield was measured for all DH lines  
333 from two-row plots. The two-row plots were 4.5m long with 0.75m spacing between rows. The  
334 number of plants within the rows was managed to represent a plant population of 7.9 pl. m<sup>-2</sup>. To  
335 manage irrigation quantity and timing drip tape was installed at a depth of approximately 0.1m  
336 and approximately 0.1m to the side of each plot row at the time of planting of the experiment. At  
337 maturity the total grain yield of a plot was measured by harvesting all ears from within the plot  
338 using a two-plot combine harvester. The total weight and moisture content of the grain from a  
339 plot were measured at the time of harvest and the harvested plot weight was converted to grain  
340 yield on an area basis at 15% moisture.

341           The experimental design in each environment was a row-column design with two  
342 replicates. The grain yield data were analyzed using the ASREML mixed model software  
343 (Gilmour et al. 2009). For the mixed model analysis the two environments, NWL and WL, were  
344 treated as fixed effects and the DH lines were treated as a random sample of lines from within  
345 their respective population. To investigate the magnitude of G×E interaction for grain yield  
346 between the NWL and WL environments for each of the four DH populations a combined  
347 analysis of variance was conducted following the recommendations of van Eeuwijk et al. (2001).  
348 When significant G×E interactions were detected the genetic correlation was estimated for grain  
349 yield between the two environments (Falconer and Mackay 1996). For reference, the genetic  
350 correlation can range from 1.0 to -1.0. A genetic correlation of 1.0 indicates there were no G×E  
351 interactions. Conversely, a genetic correlation of -1.0 indicates strong G×E interactions with  
352 complete rank reversal of the DH lines between the two environments. For the selected mixed  
353 model analysis of variance Best Linear Unbiased Predictors (BLUPs) were computed for grain  
354 yield of each of the DH lines in the NWL and WL environments. These grain yield BLUPs were  
355 then used for the CGM-WGP and BayesA prediction analyses.

356           A leave-one-family-out cross-validation was conducted to assess prediction accuracy for  
357 grain yield. Here the CGM-WGP model was selected using an estimation data set based on the  
358 yield data from both the NWL and WL environments for three of the four DH populations and  
359 then used to predict the yield values of the fourth DH population for both the NWL and WL  
360 environments. This process was repeated until each population was left out once. Since the  
361 estimation set comprised yield data from both the yield in the NWL and WL environments this is  
362 a multi-environment estimation set. Prediction accuracy for the lines of the DH population left  
363 out of the estimation set was calculated as the correlation between predicted and observed yield  
364 BLUP values separately for both the NWL and WL environments.



365           The physiological traits for the empirical study were the same as those used for the  
366 simulation study; AMAX, RUE, MEB and BKP. Prior estimates of physiological trait means and  
367 variances ( $\hat{m}_t$  and  $\hat{v}_t$ ) covered the typically observed biological ranges. The values of the means  
368 were  $\hat{m}_{AMAX} = 850$ ,  $\hat{m}_{RUE} = 1.85$ ,  $\hat{m}_{BKP} = 2.0$ , and  $\hat{m}_{MEB} = 0.75$  and those of the variances  
369  $\hat{v}_{AMAX} = 76.5^2$ ,  $\hat{v}_{RUE} = 0.13^2$ ,  $\hat{v}_{BKP} = 0.25^2$ , and  $\hat{v}_{MEB} = 0.13^2$ . The values of  $\hat{v}_{e_j}$  were  
370  $\hat{v}_{e_{FS}} = 144.0^2$  and  $\hat{v}_{e_{WW}} = 70.3^2$ . Both of which were obtained from an ASREML analysis of  
371 the original data.

372           The classical BayesA WGP model (Meuwissen et al. 2001) was used as a reference  
373 method relative to which we measure the benefit of modeling G×E interactions with CGM-WGP.  
374 The BayesA model was applied directly to the BLUP yield average over the two environments.

375

## 376 *2.8 Large scale evaluation of hybrids never tested in the field*

377           The CGM-WGP methodology can be used to make predictions within the set of  
378 experiments used for model training and evaluation, as demonstrated by Cooper et al. (2016).  
379 This application is comparable with BayesA and other statistical based methodologies (Heffner et  
380 al. 2009, Lorenz et al., 2011). Because CGM-WGP estimates the value of the alleles for each  
381 polymorphic marker locus for each physiological parameter included for CGM-WGP model  
382 training, it is possible to generate predictions for any combination of management and  
383 environment for any individual that has been genotyped and belongs to the genetic inference  
384 space. A simulation experiment using genetic parameters estimated for individuals from a  
385 breeding population (see above) and environments included in the TPE (Messina et al., 2015) was  
386 conducted to demonstrate the feasibility of augmenting field evaluation with in-silico evaluation  
387 of untested genotypes at large scale. Parameters to run the mechanistic CGM model were

388 estimated for individuals from a breeding population using the method and breeding experiments  
389 described above. Environment and management inputs to run the CGM in 2263 30 x 30 km grids  
390 within the maize growing region for 1988 and 2014 are described in Messina et al. (2015).  
391 Briefly, weather data were from NOAA. Solar radiation was estimated from temperature records  
392 (Bristow and Campbell, 1984) with parameters provided by Mud Springs Geographers, Inc, and  
393 hourly vapor pressure deficit (VPD) was estimated from daily temperature assuming an harmonic  
394 change in daily cycle (Monteith and Unsworth, 1990). Soil depth was from the STATSGO  
395 database (United States Department of Agriculture, 2015) and used to estimate total soil water  
396 holding capacity by multiplying it by a constant ( $0.13 \text{ cm}^{-3} \text{ cm}^{-3}$ ) volumetric fraction of available  
397 soil water. Crop management data that includes plant population, planting date and maturity  
398 group were from DuPont Pioneer data bases.

399

### 400 **3. Results and Discussion**

#### 401 *3.1 Physiological determinants of G×E interactions for yield*

402 The simulation study included three environments contrasting for water availability, as  
403 characterized by the water supply to demand ratio index (Fig. 2). Water deficit was largest at  
404 flowering time in WL1 and at grain filling in WL2. Simulations for the year 2010 (NWL)  
405 indicated absence of water stress with SD equal to 1 throughout the growing season (SD for NWL  
406 not shown on Fig. 2). This combination of environments set the conditions to observe differential  
407 effects of physiological traits on yield (Fig. 3) and consequently create a case study to test the  
408 CGM-WGP and BayesA algorithms for ability to construct predictive genetic models (Tables 1,  
409 2).

410           Figure 3 shows the conditional influence of the four physiological traits on yield in the  
411 three environments when holding the other traits constant at their mean and yield is standardized  
412 relative to the distribution when all traits are varying. Because of the occurrence of stress around  
413 flowering time (Fig. 2), MEB has the largest impact on yield in environment WL1 (Fig. 3b).  
414 Yield and drought tolerance in maize decreased in WL1 with increasing MEB, as demonstrated in  
415 previous studies (Messina et al., 2011, Cooper et al. 2014). With increasing AMAX (Fig. 3a),  
416 RUE (Fig. 3c) and BKP (Fig. 3d) traits yield increased in the NWL environment and decreased in  
417 the drought stress environments WL1 and WL2. These results are consistent with those observed  
418 in other studies (Sinclair and Muchow, 2001; Messina et al., 2011; Messina et al., 2015). The  
419 traits AMAX, RUE and BKP regulate crop canopy level transpiration thus the water use  
420 dynamics during the growing season. Water use decreases with decreasing values of any of these  
421 traits, which is a mechanism to conserve water during the vegetative period. When water deficit  
422 occurs at flowering time, water conservation may have a large impact on yield (Cooper et al.  
423 2014a). Because of the high sensitivity of silking to water deficit (Hall et al., 1982; Bolaños and  
424 Edmeades, 1993), the greater intensity of water deficit at flowering time in WL1 (Fig. 2) yield in  
425 WL1 decreased with increasing AMAX, RUE and BKP traits more than in WL2 (Fig. 3). At a  
426 constant value of AMAX, RUE, BKP or MEB, simulated yield using the CGM can increase,  
427 decrease or show no change depending on the environment. This G×E interaction for yield,  
428 resulting from the interplay between physiological process and the environment, was previously  
429 referred as functional emergent behavior (Hammer et al., 2006). This attribute of the CGM to  
430 generate variable outputs conditional to a vector of constants that characterize physiological traits  
431 is what make these algorithms potentially useful functions to construct simple additive predictive  
432 genetic models for traits incorporated into the CGM that can produce complex outputs that  
433 reproduce G×E interactions and fitness landscapes for yield (Messina et al., 2011; Hammer et al.,  
434 2006; Hammer et al., 2010).

435

436 *3.2 CGM-WGP incorporates biological insight within genomic prediction algorithms and*  
437 *increase prediction accuracy*

438         The simulation results reported in this study introduce enhanced realism relative to  
439 Technow et al. (2015) with yield responses to physiological trait variation more subtle and linear  
440 than in the previous study (Fig. 3). The average prediction accuracy of CGM-WGP when trained  
441 in one, two or three environments was 0.55 (Table 1), 0.75 and 0.75 (Table 2), respectively. In  
442 contrast, the average prediction accuracy for BayesA was 0.24 for one (Table 1), 0.23 for two and  
443 0.32 for three (Table 2) training environments, respectively. Despite the absence of major non-  
444 linear yield response to variation in physiological traits, as in Technow et al. (2015), the results  
445 from this study support the conclusion that CGM-WGP increased prediction accuracy over the  
446 BayesA method by incorporating biological insight into the prediction algorithm.

447         Although the CGM-WGP average accuracy was greater than for BayesA, there were  
448 cases where BayesA accuracy could be equal or greater than CGM-WGP's (Table 1), for  
449 example, when the prediction and the estimation environments were alike due to the common  
450 effects of drought (WL1, WL2). Cooper et al. (2016) reported similar results for an application  
451 of CGM-WGP to two drought environments that were part of a MET from within a breeding  
452 program. In contrast, there were no cases where the accuracy of BayesA was greater than that for  
453 CGM-WGP when the estimation environment differed from the prediction environment (e.g.,  
454 WL1 vs. NWL). In the presence of the emergent G×E interactions at the yield level due to the  
455 contrasting influences of the physiological traits in the different environments (Fig. 3) BayesA  
456 accuracy could be negative (Table 1). For example, when BayesA was trained in WL1 and  
457 predictions were made in NWL, the mean prediction accuracy was -0.62. As should be expected  
458 similar results were obtained for the reverse scenario when BayesA was trained in NWL and

459 predictions were made in WL1 ( $r = -0.60$ , Table 1). Negative prediction accuracies were not  
460 observed for CGM-WGP ( $r \geq 0.22$ , Table 1), indicating the algorithm was able to define genetic  
461 models for physiological adaptive traits that account for the presence of G×E interactions and the  
462 effect of the variable environments on the prediction of yield performance.

463 Prediction accuracy for both CGM-WGP and BayesA increased with increasing number  
464 of estimation environments (Table 1, Table 2). The pattern observed for estimation and prediction  
465 using single environment data remains evident when more than one environment is included in  
466 the estimation set (Table 2). Negative prediction accuracy was still estimated for BayesA when  
467 estimation and prediction environments were dissimilar but not for CGM-WGP (Table 2).

468

469 *3.3 Prediction accuracy depends on environment type that reveals genetic variation in adaptive*  
470 *physiological traits*

471 Prediction accuracy for physiological traits depends on the environment type of the  
472 estimation set (Table 3). While highest accuracies for BKP were estimated when estimation sets  
473 were drought environments WL1 and WL2, highest accuracy for AMAX and RUE were  
474 estimated when the estimation set was NWL environment (Table 3). Yield increased markedly  
475 with increasing AMAX and RUE within the NWL environment (Fig. 3), which is associated with  
476 the highest accuracy attained for these two traits in this environment type. Because the magnitude  
477 of the yield response to change in MEB depends on intensity of water deficit at flowering time  
478 (Fig. 3, Fig. 2), the highest accuracy for the estimation of MEB was observed when data from  
479 WL1, which experienced the greatest level of water deficit at flowering, was used as the  
480 estimation set (Fig. 2; Table 3). With the absence of (NWL) or moderate (WL2) water deficit at  
481 flowering time, low prediction accuracy was estimated for MEB when these environments were  
482 used as estimation sets, -0.03 and 0.17, respectively. These differential accuracies for estimating

483 physiological traits translate into variable accuracies for yield prediction. While accuracy of yield  
484 prediction for environment WL2 using a model trained using data for WL1 is 0.51, the accuracy  
485 for the reciprocal is 0.34 (Table 2). Similarly, the accuracy of prediction in WL1 using a model  
486 trained using data from WL2 and NWL is 0.72, which is lower than for other combinations (0.79  
487 and 0.76). Overall accuracy for yield and physiological trait prediction increased with increasing  
488 number of environments included in the estimation set (Tables 1, 2, 3, 4) as more environment  
489 types are included that expose variation in adaptive physiological traits enabling the algorithm to  
490 find adequate genetic models. This new evidence suggests that further improvements in  
491 predictability may be possible by leveraging managed stress environments and optimizing the  
492 combinations of types of environments required to expose genetic variation for adaptive traits.

493

494 *3.4 CGM-WGP improved prediction accuracy relative to BayesA for systems where  $G \times E$  is an*  
495 *important determinant of yield is demonstrated in breeding trials*

496 As in the simulation study above, for the empirical study prior to analysis of the grain  
497 yield data and application of the CGM-WGP and BayesA methods the impact of the different  
498 irrigation management strategies was investigated to characterize the two environments.  
499 Following the same procedures described above for the simulation study, the daily time step  
500 water SD profiles were determined for the Viluco well-watered and water-limited irrigation  
501 treatments (Fig. 4). For the well-watered treatment the SD profile remained at, or close to, 1.0 for  
502 the duration of the crop cycle. Thus, the well-watered treatment was managed to realize a non-  
503 water-limited environment (NWL). For the water-limited treatment irrigation was reduced,  
504 commencing in the vegetative stage around V7, and the SD profile decreased to a value below  
505 0.2, coinciding with the timing of flowering for the DH populations tested. After flowering of the  
506 DH families was completed irrigation was resumed and the SD profile increased and was

507 maintained between 0.5 and 1.0 for the remainder of the crop cycle. Thus, the water-limited  
508 treatment was managed to realize a water-limited environment (WL), where the peak of the water  
509 limitation was imposed during flowering time of the DH lines to impact yield development  
510 through imposition of a flowering stress drought. Therefore, the testing of the four DH  
511 populations in the combination of the NWL and WL environments provided a suitable empirical  
512 MET for evaluating the CGM-WGP methodology, where the traits of interest were relevant for  
513 predicting grain yield of the maize DH lines in drought and non-drought environments, as was  
514 demonstrated in the simulation study.

515 Analysis of variance indicated that there were significant G×E interactions for grain yield  
516 between the NWL and WL environments for all four DH populations. Therefore, further analyses  
517 of variance for each DH population focused on the genetic correlation for yield between the two  
518 environments and the magnitude of genetic variance for yield within the NWL and the WL  
519 environments (Table 5). There was significant genetic variation for grain yield in the NWL and  
520 WL environments for all four DH populations. The magnitude of the variance components for  
521 yield in the WL environment was greater for DHPop3 and DHPop4 compared to DHPop1 and  
522 DHPop2 (Table 5). For the NWL environment, the magnitude of genetic variance for yield was  
523 greater for DHPop4 than for the other three DH populations. The genetic correlation for grain  
524 yield between the NWL and WL environments differed among the four DH populations (Table  
525 5). To visualize the different magnitudes of genetic variance for grain yield and the different  
526 genetic correlations between the NWL and WL environments scatter diagrams were constructed  
527 for each DH population for the grain yield BLUPs (Fig. 5). For DHPop1 (Table 5, Fig. 5a) there  
528 was no correlation between NWL and WL. For DHPop2 there was an indication of a negative  
529 genetic correlation (Table 5, Fig. 5b). For both DHPop3 (Table 5, Fig. 5c) and DHPop4 (Table 5,  
530 Fig. 5d) there was a positive correlation. The different grain yield results for the four DH  
531 populations provides evidence that the physiological and therefore the genetic basis of the grain  
532 yield variation expressed in the NWL and WL environments differed among the four DH

533 populations. Therefore, the results obtained from the empirical MET encompass a number of the  
534 scenarios examined in the simulation study and represent important technical issues that need to  
535 be addressed in an applied maize breeding program.

536 On average CGM-WGP ( $r = 0.34$ ) resulted in higher prediction accuracy than BayesA ( $r$   
537  $= 0.23$ ) over all predication scenarios considered for the four DH populations (Table 6). Both  
538 CGM-WGP and BayesA had higher prediction accuracy for the WL environment ( $r = 0.45$  and  
539  $0.33$ , respectively) than for the NWL environment ( $r = 0.23$  and  $0.14$ , respectively). In the WL  
540 environment the prediction accuracy was positive for all DH populations for both CGM-WGP  
541 and BayesA (Table 6). Further for all four DH populations the prediction accuracy for the CGM-  
542 WGP was higher than for BayesA for the WL environment. For the NWL environment CGM-  
543 WGP achieved positive prediction accuracy for all four DH populations. However, for BayesA  
544 the ability to achieve a positive prediction accuracy for the NWL environment depended on the  
545 DH population. For two of the DH populations (DHPop1 and DHPop3) positive prediction  
546 accuracy was achieved, while for the other two DH populations (DHPop2 and DHPop4) it was  
547 not possible to predict grain yield in the NWL environment. Collectively the prediction accuracy  
548 results indicate that compared to the BayesA methodology, which was applied to the average  
549 grain yield performance across the WL and NWL environments, there were realized advantages  
550 in prediction accuracy for yield in both the WL and the NWL environments from the modeling of  
551 the G×E interactions between the WL and NWL environments by the CGM-WGP methodology.

552

553 *3.5 Evaluation of germplasm in virtual environments augments empirical testing through*  
554 *simulation of untested hybrids in large scale evaluation trials*

555 In this paper a set of yield predictions were made to compare CGM-WGP methodology  
556 with BayesA using a breeding population (Table 6). Because yield predictions were made



557 utilizing the CGM-WGP methodology, parameters to run the mechanistic CGM could be  
558 estimated for these lines from genotypic information and allele values. Figure 6a shows simulated  
559 yields for two DH lines in 2263 grids in 2014 and 1988. Yield for DH line 1 showed higher yields  
560 than DH line 2 virtually across the U.S. corn belt in 2014 but not in 1988. The yield differential  
561 varied with geography indicating G×E interactions. Indeed, the relationship between DH line 1( $x$ )  
562 and 2 ( $y$ ) across all grids and the two years characterized using a linear regression model is  
563  $y = 51.8(\mp 0.6) + 0.94(\mp 0.00051)x$ . From these parameters it is feasible to estimate that DH  
564 line 1 perform better than DH line 2 in environments where yield is greater than  $877 \text{ g m}^{-2}$  but not  
565 below this threshold. Further evaluations were conducted for two years and 34 DH lines (Fig. 6).  
566 This level of testing is not feasible using empirical approaches even at advanced stages of product  
567 evaluation, but views of plausible performance that can inform testing could become available for  
568 untested DH lines. These results demonstrate reduction to practice of the methodology at the  
569 scale of the early hybrid advancement stages of a breeding program. The method demonstrated in  
570 this paper enable simulation studies that inform decision about the creation of products and their  
571 plausible placement in different geographies and cropping systems.

572

#### 573 **4. Implication for crop model development and application**

574 The integration of the hierarchical model with the Metropolis-Hastings within Gibbs  
575 algorithm enabled using multiple sources of data, observed and virtual, to evaluate CGM-WGP  
576 prediction skill. This method is a significant advancement relative to and advocated by prior  
577 studies (Technow et al., 2015; Cooper et al., 2016). This enhanced capability enabled studies that  
578 demonstrated that increasing the number of environments per se does not necessarily increase  
579 predictive accuracy of CGM-WGP but the combination of environment types that enable  
580 expression of relevant genetic variation for adaptive physiological traits is a productive approach  
581 to increase predictive accuracy.

582 To realize potentially higher predictive skills, CGMs must incorporate quantitative  
583 biological relations that can capture the expression of traits when these are exposed as a result of  
584 new experimental designs and precision phenotyping. Many of these relations are unknown and  
585 likely surface to the known with the creation of new germplasm and genetic diversity. While the  
586 construction of the CGM used in this study was guided by prior research on relevant traits  
587 influencing yield in WL and NWL environments (Hammer et al., 2009; Messina et al, 2009;  
588 Messina et al., 2011; Choudhary et al., 2014; Cooper et al., 2014 ; Messina et al., 2015; Reyes et  
589 al., 2015; Cooper et al., 2016) it was possible to identify variation in predictive accuracy among  
590 breeding populations and examples where CGM-WGP was not better than the reference BayesA  
591 method. More cases such as this should be expected and suggest the need to consider plausible  
592 avenues of research and development to maximize the opportunities to realize improved  
593 accuracy. Out of many plausible solutions the development of a “second generation crop growth  
594 model” (SCGM) and the link between Phenomics and CGM are considered briefly.

595 A SCGM for use within CGM-WGP is designed and created within a dynamic  
596 framework that enables rapid changes in the CGM to align it to evolving WGP algorithms,  
597 germplasm, breeders’ questions and objectives, to leverage phenomics capabilities, and to  
598 effectively deal with scientist bias. Brown et al. (2014) demonstrates a promising framework to  
599 enable the development of models of various complexities and that could be evolved quickly by  
600 practitioners. A missing component to Brown’s framework is a life cycle management system  
601 that provides guidance to the needs of creating new models as well as to retire models. The  
602 implementation of authoritative repositories of quality experimental data is necessary to a SCGM  
603 life management system and eliminates the need for centralized controlled systems that may  
604 delay the implementation of SCGM. Holsworth et al. (2014) discuss promising opportunities  
605 such as “The Stack” that can enable model evaluation but also simulation at global scale,

606 extending the application demonstrated in this research for the U.S. corn belt to other crops and  
607 geographies.

608           A SCGM will be applied to experiments with increasing size, data type diversity  
609 generated by phenotyping platforms, and complexity. Although the metropolis-within Gibbs  
610 sampling algorithm introduced here can improve the efficiency and decrease computing demands,  
611 as demonstrated in this paper, it is inevitable that faster models will be required to work with  
612 larger and more complex breeding experiments, involving hundreds of environments and  
613 thousands of genotypes from diverse germplasm sources, where convergence due to a more  
614 complex system may require increasing the number of iterations to reach convergence. Runtime  
615 will become even more relevant as stochasticity is incorporated into SCGM to deal formally with  
616 measurement error, environmental uncertainty, and internal stochasticity characteristic of  
617 complex systems (Wallach et al., 2012; Technow et al., 2015). Such models in combination with  
618 faster algorithms will enable answering fundamental questions about the role of internal system  
619 variability on the determination of predictability. Both the need to explore larger CGM parameter  
620 spaces when applying the model to new breeding populations, and the availability of trait  
621 information that will force identification of solutions that satisfy multiple constraints suggests that  
622 a fundamental area of research can focus on how predictability and prediction skill changes with  
623 CGM-WGP complexity. As model complexity increases, so will the unknowns and the  
624 complexity of the performance landscape that may reduce the ability to find global optima.  
625 Answers to these questions will enable designing improved strategies to effectively deal with  
626 limited predictability to accelerate genetic gain.

627           Phenomics and SCGM will be integrated to form a virtuous cycle of mutual development  
628 while delivering improved genetic and physiological mechanistic models, and improved  
629 predictions (Cooper et al., 2002; Houle et al., 2010; Messina et al., 2011). High throughput  
630 phenotyping platforms, here considered broadly to include managed stress environments, will

631 provide data to both train CGM-WGP and to enhance biological mechanistic models (Houle et  
632 al., 2010; Cooper et al., 2014; Pauli et al., 2016). CGM can inform phenotyping based on known  
633 physiological understanding but also serve as frameworks that help identify knowledge gaps  
634 (Hammer et al., 2002). SCGM-WGP becomes the integration framework that enables the  
635 incorporation of data for multiple traits, which are outputs from high throughput phenotyping  
636 platforms, genomic information, agronomy and environment. A model to enable such integration  
637 could be of the form,

$$638 \quad y_{ijp} \sim N \left( CGM(T_{ti}, E_j)_p, \sigma_{e_{jp}}^2 \right)$$

639 where  $y_{ijp}$  is a set of measurable phenotypes ( $p$ ) influenced by functional trait  $t$  and measurable  
640 using platforms (eg. leaf area, leaf angle that influence functional traits, such as RUE, which are  
641 captured in the relationships of the CGM) with error variance  $\sigma_e^2$  for phenotype  $p$  in environment  
642  $j$ . The methods described in this paper could be applied to train this model. This approach is a  
643 significant change relative to the two stage approaches advocated to date (Xin et al, 2004;  
644 Hammer et al., 2006; Chenu et al., 2009; Messina et al., 2011; Pauli et al., 2016) because it  
645 provides an integrated and flexible framework to tune the utilization of phenomics to the breeding  
646 or more general, to the plant science objective. Predictions from this model are testable  
647 hypothesis with physiological and genetic components. It is less clear in the literature and a clear  
648 area of future research how to extend the framework to handle knowledge gaps through  
649 integration of polygenic terms that could be handled through statistical models within the  
650 framework.

651

652 **5. Concluding remarks**

653           This research used a combination of simulation and empirical studies to explain how the  
654 CGM-WGP methodology introduced by Technow et al. (2015) works to achieve enhanced levels  
655 of prediction accuracy and to demonstrate reduction to practice for some applications to maize  
656 breeding and product placement for target environments in the US corn-belt. This new  
657 development in modeling, achieved through the integration of genetic and physiological modeling  
658 capabilities, provides a research platform for enhancing predictions of crop yield that can account  
659 for important components of G×E×M interactions that influence crop productivity. The  
660 development of the hierarchical model enabled studies to demonstrate the critical use of diverse  
661 environments as estimation sets for CGM-WGP as these reveal genetic variation for adaptive  
662 physiological traits. Three important outcomes of the CGM-WGP methodology that merit further  
663 consideration and investigation are: (1) The algorithm used within the CGM-WGP method to  
664 connect genetic information to the traits that vary among genotypes and respond to environmental  
665 conditions to influence yield is conducted as an integrated single step process. This single step  
666 approach contrasts with previous two-step methods that first seek to identify genes or regions of  
667 the genome (QTL) that map to traits proposed to influence yield, which are then in turn integrated  
668 within the CGM as predictors in a second step. (2) Some of the requirements of high-throughput  
669 phenotyping are relaxed and radically changed in comparison to the alternative two-step  
670 approaches. In the two-step approaches advocated to date all individuals have to be phenotyped  
671 for all traits in all environments to establish the relationship between genes or QTL and the traits  
672 prior to integration into the CGM. For CGM-WGP this dense level of phenotyping may not  
673 always be required, the phenotyping load can be reduced, and efforts seeking to generate large  
674 volumes of data may be turned into efforts seeking to unravel the physiological basis of  
675 adaptation and how to incorporate the resulting knowledge into mechanistic models. For many  
676 applications emphasis can be placed on phenotyping efforts to establish the functional  
677 relationships that are established within the CGM and to develop informative prior distributions  
678 to be used with the CGM to enable the CGM-WGP. (3) New criteria are emerging as

679 foundational principles for developing a second generation of CGMs that explicitly incorporate  
680 the concept of genetic variation for traits at different scales in biological hierarchies (e.g., cellular  
681 to tissue to organ to crop canopy), and their functional relationships across these hierarchical  
682 scales in biology.

683 **References**

- 684 Bell, J. E., M.A. Palecki, C.B. Baker, W.G. Collins, J.H. Lawrimore, R.D. Leeper, M.E. Hall, J.  
685 Kochendorfer, T.P. Meyers, T. Wilson, and H. J. Diamond. 2013. U.S. Climate Reference  
686 Network soil moisture and temperature observations. *J. Hydrometeorol.* 14:977-988.
- 687 Birch, C.J., Hammer, G.L., Rickert, K.G., 1998. Improved methods for predicting individual leaf  
688 area and leaf senescence in maize (*Zea mays*). *Aust. J. Agric. Res.* 49: 249-262.
- 689 Bolaños, J., and G.O. Edmeades. 1993. Eight cycles of selection for drought tolerance in lowland  
690 tropical maize. II. Responses in reproductive behavior. *Field Crops Res.* 31:253-268.
- 691 Bristow, K.L., and G.S. Campbell. 1984. On the relationship between incoming solar radiation  
692 and daily maximum and minimum temperature. *Agric. For. Meteorol.* 31:159-166.
- 693 Brown, H. E., N.I. Huth, D.P. Holzworth, E.I. Teixeira, R.F. Zyskowski, J.N.G. Hargreaves, D.J.  
694 Moot. 2014. Plant Modelling Framework: Software for building and running crop models on the  
695 APSIM platform. *Environmental Modelling & Software* 62:385-398.
- 696 Chenu, K., S.C. Chapman, F. Tardieu, G. McLean, C. Welcker, and G.L. Hammer. 2009.  
697 Simulating the yield impacts of organ-level quantitative trait loci associated with drought  
698 response in maize: a "gene-to-phenotype" modeling approach. *Genetics* 183:1507-1523.
- 699 Choudhary, S., T.R. Sinclair, C.D. Messina, and M. Cooper. 2014. Hydraulic conductance of  
700 maize hybrids differing in transpiration response to vapor pressure deficit. *Crop Sci.* 54:1147-  
701 1152.
- 702 Cooper, M., S.C. Chapman, D.W. Podlich, and G.L. Hammer. 2002. The GP problem:  
703 quantifying gene-to-phenotype relationships. *In Silico Biol.* 2:151-164.

- 704 Cooper, M., D.W. Podlich, and O.S. Smith. 2005. Gene-to-phenotype models and complex trait  
705 genetics. *Aust. J. Agric. Res.* 56: 895-918.
- 706 Cooper, M., F.A. van Eeuwijk, G.L. Hammer, D.W. Podlich, and C. Messina. 2009. Modeling  
707 QTL for complex traits: detection and context for plant breeding. *Curr. Opin. Plant Biol.* 12:231-  
708 240.
- 709 Cooper, M., C.D. Messina, D. Podlich, L.R. Totir, A. Baumgarten, N.J. Hausmann, D. Wright,  
710 and G. Graham. 2014. Predicting the future of plant breeding: complementing empirical  
711 evaluation with genetic prediction. *Crop Pasture Sci.* 65: 311-336.
- 712 Cooper, M., F. Technow, C. Messina, C. Gho, and L. Radu Totir. 2016. Use of crop growth  
713 models with whole-genome prediction: Application to a maize multienvironment trial. *Crop Sci.*  
714 56:1-16.
- 715 Dardanelli, J.L., O.A. Bachmeier, R. Sereno, and R. Gil. 1997. Rooting depth and soil water  
716 extraction patterns of different crops in a silty loam Haplustoll. *Field Crops Res.* 54:29–38.
- 717 Dong, Z., O. Danilevskaya, T. Abadie, C. Messina, N. Coles, and M. Cooper. 2012. A gene  
718 regulatory network model for floral transition of the shoot apex in maize and its dynamic  
719 modeling. *PLoS ONE* 7(8): e43450. doi:10.1371/journal.pone.0043450
- 720 Elings, A. 2000. Estimation of leaf area in tropical maize. *Agron. J.* 92: 436-444.
- 721 Fahlgren, N., M.A. Gehan, and I. Baxter. 2015. Lights, camera, action: high-throughput plant  
722 phenotyping is ready for a close-up. *Curr. Opin. Plant Biol.* 24: 93-99.
- 723 Falconer, D.S. and T.F.C. Mackay. 1996. *Introduction to Quantitative Genetics (Fourth Edition)*.  
724 Longman Group Limited, Essex, England.



- 725 Furbank, R.T. and M. Tester. 2011. Phenomics — technologies to relieve the phenotyping  
726 bottleneck. *Trends Plant Sci.* 16:635-644.
- 727 Gaffney, J., J. Schussler, C. Löffler, W. Cai, S. Paszkiewicz, C. Messina, J. Groeteke, J.  
728 Keaschall, and M. Cooper. 2015. Industry-scale evaluation of maize hybrids selected for  
729 increased yield in drought-stress conditions of the US corn belt. *Crop Sci.* 55: 1608-1618.
- 730 Gelman, A., J.B. Carlin, H.S. Stern, and D.B. Rubin. 2004. *Bayesian data analysis*. CRC Press,  
731 Boca Raton, FL, USA.
- 732 Gholipoor, M., S. Choudhary, T.R. Sinclair, C.D. Messina, and M. Cooper. 2013. Transpiration  
733 response of maize hybrids to atmospheric vapor pressure deficit. *J. Agron. Crop Sci.* 199: 155-  
734 160.
- 735 Gilmour, A.R., B.J. Gogel, B.R. Cullis, and R. Thompson. 2009. *ASReml User Guide Release*  
736 3.0 VSN International Ltd, Hemel Hempstead, HP1 1ES, UK.
- 737 Habier, D., R.L. Fernando, K. Kizilkaya, and D.J. Garrick. 2011. Extension of the Bayesian  
738 Alphabet for Genomic Selection. *BMC Bioinformatics* 12: 186.
- 739 Hall, A.J., F. Vilella, N. Trapani, and C. Chimenti. 1982. The effects of water stress and genotype  
740 on the dynamics of pollen-shedding and silking in maize. *Field Crops Res.* 5:349-363.
- 741 Hammer, G.L., M.J. Kropff, T.R. Sinclair, J.R. Porter. 2002. Future contributions of crop  
742 modelling—from heuristics and supporting decision making to understanding genetic regulation  
743 and aiding crop improvement. *Eur. J. Agron.* 18:15-31.
- 744 Hammer, G, M. Cooper, F. Tardieu, S. Welch, B. Walsh, F. van Eeuwijk, S. Chapman, and D.  
745 Podlich. 2006. Models for navigating biological complexity in breeding improved crop plants.  
746 *Trends Plant Sci.* 11:587-593.

- 747 Hammer, G.L., Z. Dong, G. McLean, A. Doherty, C. Messina, J. Schussler, C. Zinselmeier, S.  
748 Paszkiewicz, and M. Cooper. 2009. Can changes in canopy and/or root system architecture  
749 explain historical maize yield trends in the U.S. Corn Belt? *Crop Sci.* 49:299-312.
- 750 Hammer, G.L., E. van Oosterom, G. McLean, S.C. Chapman, I. Broad, P. Harland, and R.C.  
751 Muchow. 2010. Adapting APSIM to model the physiology and genetics of complex adaptive  
752 traits in field crops. *J. Exp. Bot.* 61:2185-2202.
- 753 Heffner, E.L., M.E. Sorrells, and J.-L. Jannink. 2009. Genomic selection for crop improvement.  
754 *Crop Sci.* 49: 1-12.
- 755 Holzworth, D.P., N.I. Huth, P.G. deVoil, E.J. Zurcher, N.I. Herrmann, G. McLean, K. Chenu, E.J.  
756 van Oosterom, V. Snow, C. Murphy, A.D. Moore, H. Brown, J.P.M. Whish, S. Verrall, J.  
757 Fainges, L.W. Bell, A.S. Peake, P.L. Poulton, Z. Hochman, P.J. Thorburn, D.S. Gaydon, N.P.  
758 Dalglish, D. Rodriguez, H. Cox, S. Chapman, A. Doherty, E. Teixeira, J. Sharp, R. Cichota, I.  
759 Vogeler, F.Y. Li, E. Wang, G.L. Hammer, M.J. Robertson, J.P. Dimes, A.M. Whitbread, J. Hunt,  
760 H. van Rees, T. McClelland, P.S. Carberry, J.N.G. Hargreaves, N. MacLeod, C. McDonald, J.  
761 Harsdorf, S. Wedgwood, B.A. Keating. 2014. APSIM-Evolution towards a new generation of  
762 agricultural systems simulation. *Environmental Modelling & Software* 62:327-350.
- 763 Houle, D., D.R. Govindaraju, and S. Omholt. 2010. Phenomics: the next challenge. *Nature Rev.*  
764 *Genetics* 11:855-866.
- 765 Lorenz, A.J., S. Chao, F.G. Asoro, E.L. Heffner, R. Hayashi, H. Iwata, K.P. Smith, M.E. Sorrells,  
766 and J.-L. Jannink. 2011. In: L.S. Donald editors, *Advances in Agronomy*. Academic Press, The  
767 Netherlands. p. 110:77-123.
- 768 Marjoram, P., A. Zubair, and S.V. Nuzhdin. 2014. Post-GWAS: where next? More samples, more  
769 SNPs or more biology? *Heredity* 112: 79-88.

- 770 Messina, C.D., J.W. Jones, K.J. Boote, and C.E. Vallejos. 2006. A gene-based model to simulate  
771 soybean development and yield responses to environment. *Crop Sci.* 46: 456-466.
- 772 Messina, C, G. Hammer, Z. Dong, D. Podlich, and M. Cooper. 2009. Modelling crop  
773 improvement in a G\*E\*M framework via gene-trait-phenotype relationships. In: V.O. Sadras and  
774 D. Calderini, editors, *Crop physiology: applications for genetic improvement and agronomy*.  
775 Elsevier, The Netherlands. p. 235–265.
- 776 Messina, C.D., D. Podlich, Z. Dong, M. Samples, and M. Cooper. 2011. Yield-Trait performance  
777 landscapes: from theory to application in breeding maize for drought tolerance. *J. Exp. Bot.* 62:  
778 855-868.
- 779 Messina, C.D., T.R. Sinclair, G.L. Hammer, D. Curan, J. Thompson, Z. Oler, C. Gho, and M.  
780 Cooper. 2015. Limited-Transpiration trait may increase maize drought tolerance in the US Corn  
781 Belt. *Agron. J.* 107:1978-1986.
- 782 Meuwissen, T.H.E, B.J. Hayes, and M.E. Goddard. 2001. Prediction of total genetic value using  
783 genome-wide dense marker maps. *Genetics* 157: 1819-1829.
- 784 Montana, G. 2005. HapSim: a simulation tool for generating haplotype data with pre-specified  
785 allele frequencies and LD coefficients. *Bioinformatics* 21:4309-4311.
- 786 Monteith, J.L., and H. Unsworth. 1990. *Principles of Environmental Physics*. 2nd ed.  
787 Butterworth-Heinemann, Jordan Hill, Oxford.
- 788 Muchow, R.C., T.R. Sinclair, and J.M. Bennett. 1990. Temperature and solar radiation effects on  
789 potential maize yield across locations. *Agron. J.* 82: 338-343.
- 790 Muchow, R.C., and T.R. Sinclair. 1991. Water deficit effects on maize yields modeled under  
791 current and “greenhouse” climates. *Agron. J.* 83: 1052-1059.

- 792 Pauli, D., S.C. Chapman, R. Bart, C.N. Topp, C.J. Lawrence-Dill, J. Poland, and M.A. Gore.  
793 2016. The quest for understanding phenotypic variation via integrated approaches in the field  
794 environment. *Plant Physiol.* 172:622-634.
- 795 Plummer, M., N. Best, K. Cowles and K. Vines. 2006. CODA: Convergence diagnosis and output  
796 analysis for MCMC. *R News* 6:7-11.
- 797 R Core Team. 2014. R: A Language and Environment for Statistical Computing. Vienna, Austria:  
798 R Foundation for Statistical Computing.
- 799 Reyes, A., C.D. Messina, G.L. Hammer, L. Liu, E. van Oosterom, R. Lafitte, M. Cooper. 2015.  
800 Soil water capture trends over 50 years of single cross maize (*Zea mays* L.) breeding in the U.S.  
801 corn-belt. *J. Exp. Bot.* 66:7339-7346.
- 802 Robertson, M.J., S. Fukai, M.M. Ludlow, and G.L. Hammer. 1993. Water extraction by grain  
803 sorghum in a sub-humid environment. I. Analysis of the water extraction pattern. *Field Crops*  
804 *Res.* 33:81-97.
- 805 Shekoofa, A., T.R. Sinclair, C.D. Messina, and M. Cooper. 2015 Variation among maize hybrids  
806 in response to high vapor pressure deficit at high temperatures. *Crop Sci.* 55:392-396.
- 807 Sinclair, T. R., J.M. Bennett, and R.C. Muchow. 1990. Relative Sensitivity of Grain Yield and  
808 Biomass Accumulation to Drought in Field-Grown Maize. *Crop Sci.* 30: 690-693.
- 809 Sinclair TR, and R.C. Muchow. 1999. Radiation Use Efficiency. In: L.S. Donald editors,  
810 *Advances in Agronomy.* Academic Press, The Netherlands. p. 215-265.
- 811 Sinclair, T.R., and R.C. Muchow. 2001. System analysis of plant traits to increase grain yield on  
812 limited water supplies. *Agron. J.* 93:263-270.

- 813 Sinclair, T.R., G.L. Hammer, and E.J. van Oosterom. 2005. Potential yield and water-use  
814 efficiency benefits in sorghum from limited maximum transpiration rate. *Funct. Plant Biol.*  
815 32:945-952.
- 816 Soltani, A., and T.R. Sinclair. 2012. Modeling physiology of crop development, growth and yield.  
817 CAB International, Wallingford, UK.
- 818 Tanner, C.B., and T.R. Sinclair. 1983. Efficient water use in crop production: Research or re-  
819 search? In: H. M. Taylor and W. R. Jordan, editors, *Limitations to Efficient Water Use in Crop*  
820 *Production*. ASA, CSSA, and SSSA, Madison, WI. p. 1-27.
- 821 Technow, F., T. A. Schrag, W. Schipprack, and A. E. Melchinger. 2014a. Identification of key  
822 ancestors of modern germplasm in a breeding program of maize. *Theor. Appl. Genetics*  
823 127:2545–53.
- 824 Technow, F., T. A. Schrag, W. Schipprack, E. Bauer, H. Simianer, and A. E. Melchinger. 2014b.  
825 Genome properties and prospects of genomic prediction of hybrid performance in a breeding  
826 program of maize. *Genetics* 197:1343–55.
- 827 Technow, F., C.D. Messina, L.R. Totir, and M. Cooper. 2015. Integrating crop growth models  
828 with whole genome prediction through approximate Bayesian computation. *PLoS ONE* 10(6):  
829 e0130855.doi:10.1371/journal.pone.0130855
- 830 U.S. Department of Agriculture. 2015. Soil survey staff, Natural Resources Conservation Service,  
831 United States Department of Agriculture. Web Soil Survey. [Online]. Available at  
832 <http://websoilsurvey.nrcs.usda.gov/>. (Verified 7 March 2015)
- 833 Van Eeuwijk, F.A., M. Cooper, I.H. DeLacy, S. Ceccarelli, S., and S. Grando. 2001. Some  
834 vocabulary and grammar for the analysis of multi-environment trials, as applied to the analysis of  
835 FPB and PPB trials. *Euphytica* 122: 477-490.

836 Wallach, D., N. Keussayan, F. Brun, B. Lacroix, and J-E. Bergez. 2012. Assessing the uncertainty  
837 when using a model to compare irrigation strategies. *Agron. J.* 104 :1274-1283.

838 Welcker, C., B. Boussuge, C. Bencivenni, J-M. Ribaut, and F. Tardieu. 2007. Are source and sink  
839 strengths genetically linked in maize plants subjected to water deficit? A QTL study of the  
840 responses of leaf growth and of anthesis-silking interval to water deficit. *J. Exp. Bot.* 58:339-349.

841 Yang, W., and R. J. Tempelman. 2012. A Bayesian antedependence model for whole genome  
842 prediction. *Genetics* 190: 1491–1501.

843 Yin, X., P.C. Struik, and M.J. Kropff . 2004. Role of crop physiology in predicting gene-to-  
844 phenotype relationships. *Trends Plant Sci* 9: 426-432.

845

846 Tables

847

848 Table 1. Mean prediction accuracies ( $\pm$  standard deviation) for yield estimated by the correlation

849 coefficient  $r$  for CGM-WGP prediction methodology and the reference method BayesA.

| Estimation<br>environment | Prediction environment |                 |                 |                  |                 |                  |
|---------------------------|------------------------|-----------------|-----------------|------------------|-----------------|------------------|
|                           | CGM-<br>WGP            |                 |                 | BayesA           |                 |                  |
|                           | WL1                    | WL2             | NWL             | WL1              | WL2             | NWL              |
| WL1(1988)                 | 0.85 $\pm$ 0.03        | 0.51 $\pm$ 0.13 | 0.60 $\pm$ 0.13 | 0.84 $\pm$ 0.03  | 0.38 $\pm$ 0.17 | -0.62 $\pm$ 0.14 |
| WL2(2012)                 | 0.34 $\pm$ 0.43        | 0.79 $\pm$ 0.06 | 0.23 $\pm$ 0.42 | 0.44 $\pm$ 0.14  | 0.78 $\pm$ 0.06 | 0.06 $\pm$ 0.28  |
| NWL(2010)                 | 0.57 $\pm$ 0.11        | 0.22 $\pm$ 0.16 | 0.88 $\pm$ 0.02 | -0.60 $\pm$ 0.11 | 0.01 $\pm$ 0.26 | 0.88 $\pm$ 0.02  |

850

851 Table 2. Mean prediction accuracies ( $\pm$  standard deviation) for yield estimated by the correlation  
 852 coefficient  $r$  for CGM-WGP prediction methodology and the reference method BayesA and nine  
 853 cases defined by a unique combination of two or three environments utilized to train the  
 854 algorithms and one environment of utilized for evaluation of accuracy. Environments include two  
 855 water limited (WL) and one not water limited (NWL) conditions.

| Estimation<br>environment | Prediction environment |                 |                 |                    |                 |                  |
|---------------------------|------------------------|-----------------|-----------------|--------------------|-----------------|------------------|
|                           | WL1(1988)              | WL2(2012)       | NWL(2010)       | WL1(1988)          | WL2(2012)       | NWL(2010)        |
|                           | ----- CGM-WGP -----    |                 |                 | ----- BayesA ----- |                 |                  |
| WL1 + WL2                 | 0.79 $\pm$ 0.04        | 0.75 $\pm$ 0.05 | 0.67 $\pm$ 0.08 | 0.77 $\pm$ 0.04    | 0.51 $\pm$ 0.13 | -0.50 $\pm$ 0.15 |
| WL2 + NWL                 | 0.72 $\pm$ 0.09        | 0.75 $\pm$ 0.06 | 0.81 $\pm$ 0.04 | -0.39 $\pm$ 0.16   | 0.26 $\pm$ 0.25 | 0.75 $\pm$ 0.07  |
| WL1 + WL2 +<br>NWL        | 0.76 $\pm$ 0.05        | 0.71 $\pm$ 0.06 | 0.77 $\pm$ 0.04 | 0.43 $\pm$ 0.13    | 0.53 $\pm$ 0.11 | -0.01 $\pm$ 0.2  |

856



857 Table 3. Mean prediction accuracies ( $\pm$  standard deviation) estimated by the correlation  
858 coefficient  $r$  for physiological process parameters: size of the largest leaf within the leaf area  
859 profile (AMAX ), mass of ear at silking (MEB), radiation use efficiency (RUE) and limited  
860 transpiration trait breakpoint (BKP).

| Estimation<br>environment | Physiological process parameter |            |                             |             |
|---------------------------|---------------------------------|------------|-----------------------------|-------------|
|                           | AMAX                            | MEB        | RUE                         | BKP         |
|                           | ----cm <sup>-2</sup> ----       | ----g----  | ----g MJ <sup>-1</sup> ---- | ----kPa---- |
| WL1 (1988)                | 0.31±0.16                       | 0.52±0.15  | 0.33±0.16                   | 0.65±0.14   |
| WL2 (2012)                | 0.26±0.2                        | 0.17±0.2   | 0.33±0.29                   | 0.68±0.23   |
| NWL (2010)                | 0.51±0.13                       | -0.03±0.19 | 0.66±0.13                   | 0.17±0.21   |

861

862 Table 4. Mean prediction accuracies ( $\pm$  standard deviation) estimated by the correlation  
 863 coefficient  $r$  for physiological process parameters: size of the largest leaf within the leaf area  
 864 profile (AMAX ), mass of ear at silking (MEB), radiation use efficiency (RUE) and limited  
 865 transpiration trait breakpoint (BKP).

| Estimation<br>environment                  | Physiological process parameter |           |                             |             |
|--------------------------------------------|---------------------------------|-----------|-----------------------------|-------------|
|                                            | AMAX                            | MEB       | RUE                         | BKP         |
|                                            | ----cm <sup>-2</sup> ----       | ----g---- | ----g MJ <sup>-1</sup> ---- | ----kPa---- |
| WL1 + NWL<br>(1988 & 2010)                 | 0.43±0.14                       | 0.53±0.12 | 0.65±0.09                   | 0.58±0.12   |
| WL1 + WL2<br>(1988 & 2012)                 | 0.42±0.10                       | 0.46±0.14 | 0.51±0.11                   | 0.78±0.07   |
| WL2 + NWL<br>(2012 & 2010)                 | 0.47±0.11                       | 0.28±0.18 | 0.66±0.10                   | 0.77±0.07   |
| WL1 + WL2 +<br>NWL (1988 &<br>2010 & 2012) | 0.44±0.12                       | 0.51±0.12 | 0.60±0.08                   | 0.75±0.07   |

866

867 Table 5. Estimates of the genetic correlation between the non-water-limited (NWL) and water-  
868 limited (WL) environments ( $r_{G(NWL,WL)} \pm$  Standard Error), genetic variance component within the  
869 non-water-limited environment ( $VG_{NWL} \pm$  Standard Error) and genetic variance component within  
870 the water limited environment ( $VG_{WL} \pm$  Standard Error) for grain yield ( $t\ ha^{-1}$ ) of four DH  
871 populations tested under WL and NWL environments at the DuPont Pioneer Viluco research  
872 station in 2012.

| DH Population | $r_{G(NWL,WL)}$  | $VG_{NWL}$        | $VG_{WL}$         |
|---------------|------------------|-------------------|-------------------|
| DHPop1        | $-0.08 \pm 0.19$ | $0.515 \pm 0.143$ | $0.505 \pm 0.130$ |
| DHPop2        | $-0.20 \pm 0.17$ | $0.686 \pm 0.157$ | $0.375 \pm 0.103$ |
| DHPop3        | $0.36 \pm 0.13$  | $0.689 \pm 0.161$ | $1.433 \pm 0.264$ |
| DHPop4        | $0.49 \pm 0.11$  | $0.944 \pm 0.179$ | $0.920 \pm 0.168$ |

873

874 Table 6. Average prediction accuracy for the CGM-WGP and BayesA methodologies obtained  
875 from applying the leave-one-family-out cross-validation approach to prediction of grain yield  
876 within the non-water-limited (NWL) and water-limited (WL) environments for four DH families.

| DH family | CGM-WGP |      | BayesA |       |
|-----------|---------|------|--------|-------|
|           | WL      | NWL  | WL     | NWL   |
| DHPop1    | 0.28    | 0.16 | 0.16   | 0.30  |
| DHPop2    | 0.44    | 0.38 | 0.29   | -0.06 |
| DHPop3    | 0.64    | 0.21 | 0.50   | 0.29  |
| DHPop4    | 0.45    | 0.18 | 0.36   | 0.02  |

877

878 Figures captions

879

880 Figure 1. Hierarchical crop growth model (CGM) whole genome prediction (WGP) algorithm.

881 Figure 2. Water supply to demand ratios estimated on a daily time step for Johnston, IA

882 calculated for 1988 (water limited, WL1) and 2012 (water limited 2, WL2) using a crop growth

883 model as a function of day of year. Simulated shedding dates for 1988 and 2012 indicated as

884 vertical bars. Model parameters were set to means of values utilized in sensitivity analyses, size

885 of the largest leaf in the leaf area profile (AMAX)=950, ear size at silking (MEB)=0.8, radiation

886 use efficiency (RUE)=1.8, and limited transpiration breakpoint (BKP)=2.25

887 Figure 3. Response of standardized yield to variation in crop growth model parameters: (a) size of

888 the largest leaf in the leaf area profile (AMAX, cm<sup>2</sup>), (b) ear size at silking (MEB, g), (c)

889 radiation use efficiency (RUE, g MJ<sup>-1</sup>), and (d) limited transpiration breakpoint (BKP, kPa) for

890 water limited environments (WL1) 1988 and (WL2) 2010, and not water limited environment

891 (NWL) 2012 at Johnston, IA USA (See Figure 2 for dynamics in supply/demand ratio). Yields

892 were standardized relative to the overall mean (1054 g m<sup>-2</sup>) and standard deviation (407 g m<sup>-2</sup>).

893 Figure 4. Water supply to demand ratios for DuPont Pioneer Viluco research station in 2012

894 calculated for water limited (WL) and not water limited (NWL) conditions using a crop growth

895 model as a function of day of year. Simulated shedding date for NWL and WL treatments

896 indicated as closed and open squares. Model parameters were set to means of values utilized in

897 sensitivity analyses, size of the largest leaf in the leaf area profile (AMAX)=950, ear size at

898 silking (MEB)=0.8, radiation use efficiency (RUE)=1.8, and limited transpiration breakpoint

899 (BKP)=2.25

900 Figure5. Grain yield observed under water-limited at flowering (WL) and non-water-limited  
901 (NWL) due to well watered (WW) environmental conditions for four DH families evaluated at  
902 the DuPont Pioneer Viluco research station in 2012.

903 Figure 6. Simulated yields for the major maize growing regions in the U.S. corn belt for 2014  
904 (a,b) and 1988 (a,c) and individuals of a breeding population with CGM parameters estimated  
905 from maker data using the CGM-WGP methodology.

906 Figure 1

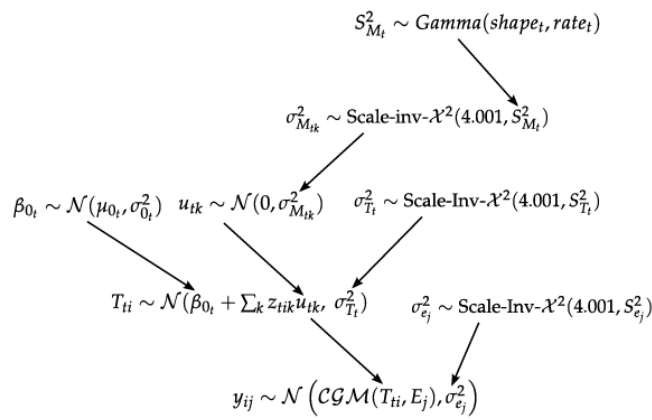

**Observed data**

$y_{ij}$  – yield of individual  $i$  in environment  $j$

$E_j$  – specifications for environment  $j$

$z_{tik}$  – score of individual  $i$  at marker  $k$  of trait  $t$

**Unobserved parameters**

$T_{it}$  – biological trait  $t$  of individual  $i$

$\beta_{0_t}, u_{tk}$  – intercept and effect of marker  $k$  for trait  $t$

$\mu_{0_t}$  – prior mean of  $\beta_{0_t}$

$\sigma^2_{e_j}, \sigma^2_{T_t}, \sigma^2_{M_{ik}}, \sigma^2_{0_t}$  – residual yield variance in env.  $j$ , prior variances of traits, marker effects, and intercepts

$S^2_{e_j}, S^2_{T_t}, S^2_{M_t}$  – scale parameters of priors for residual yield variance, variance of trait  $t$  and of marker effects

$\text{shape}_t, \text{rate}_t$  – parameters for prior of  $S^2_{M_t}$

907

908 Figure 2

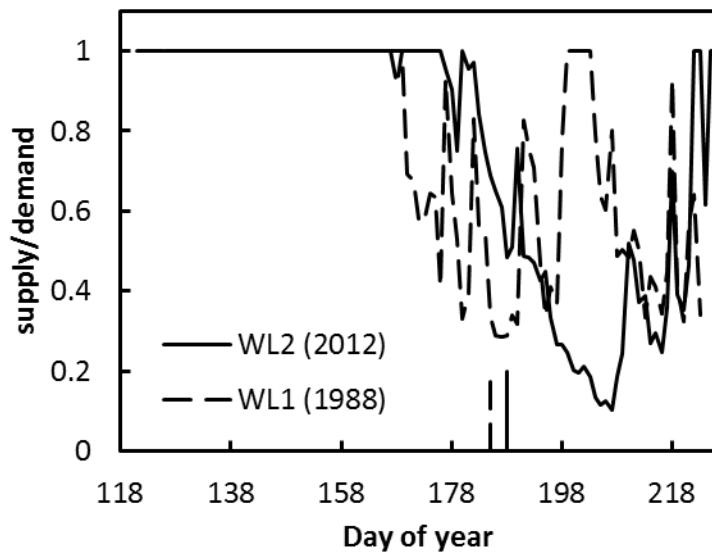

909



910 Figure 3

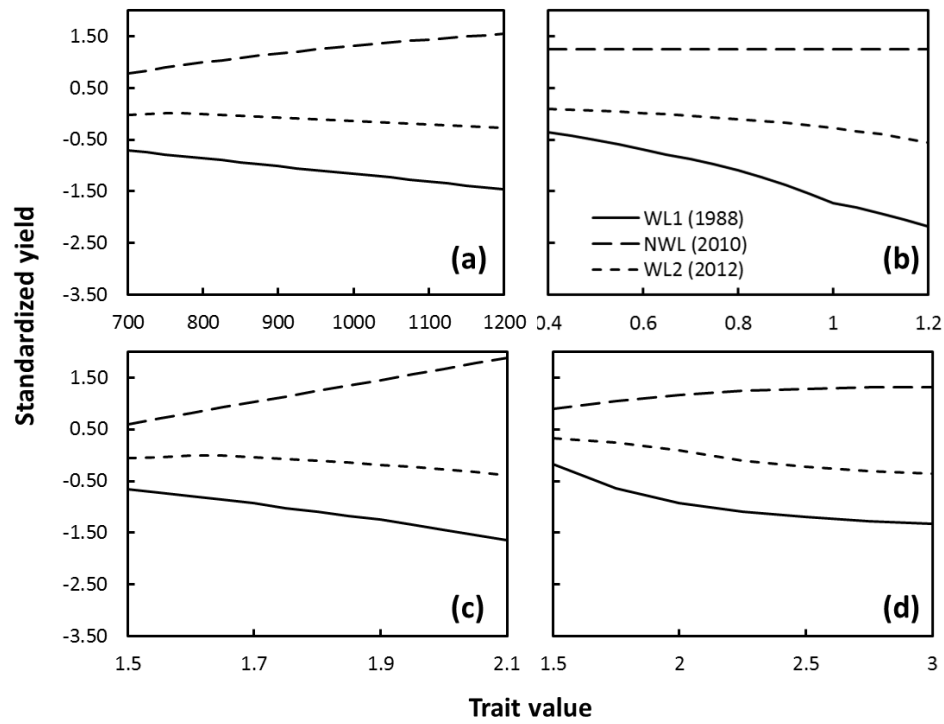

911

912 Figure 4

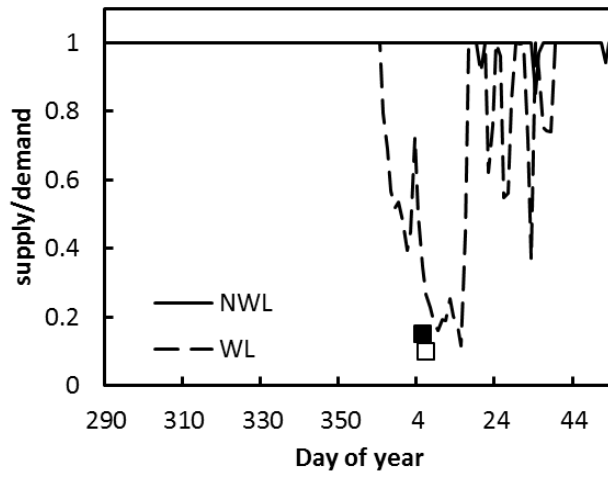

913

914 Figure 5

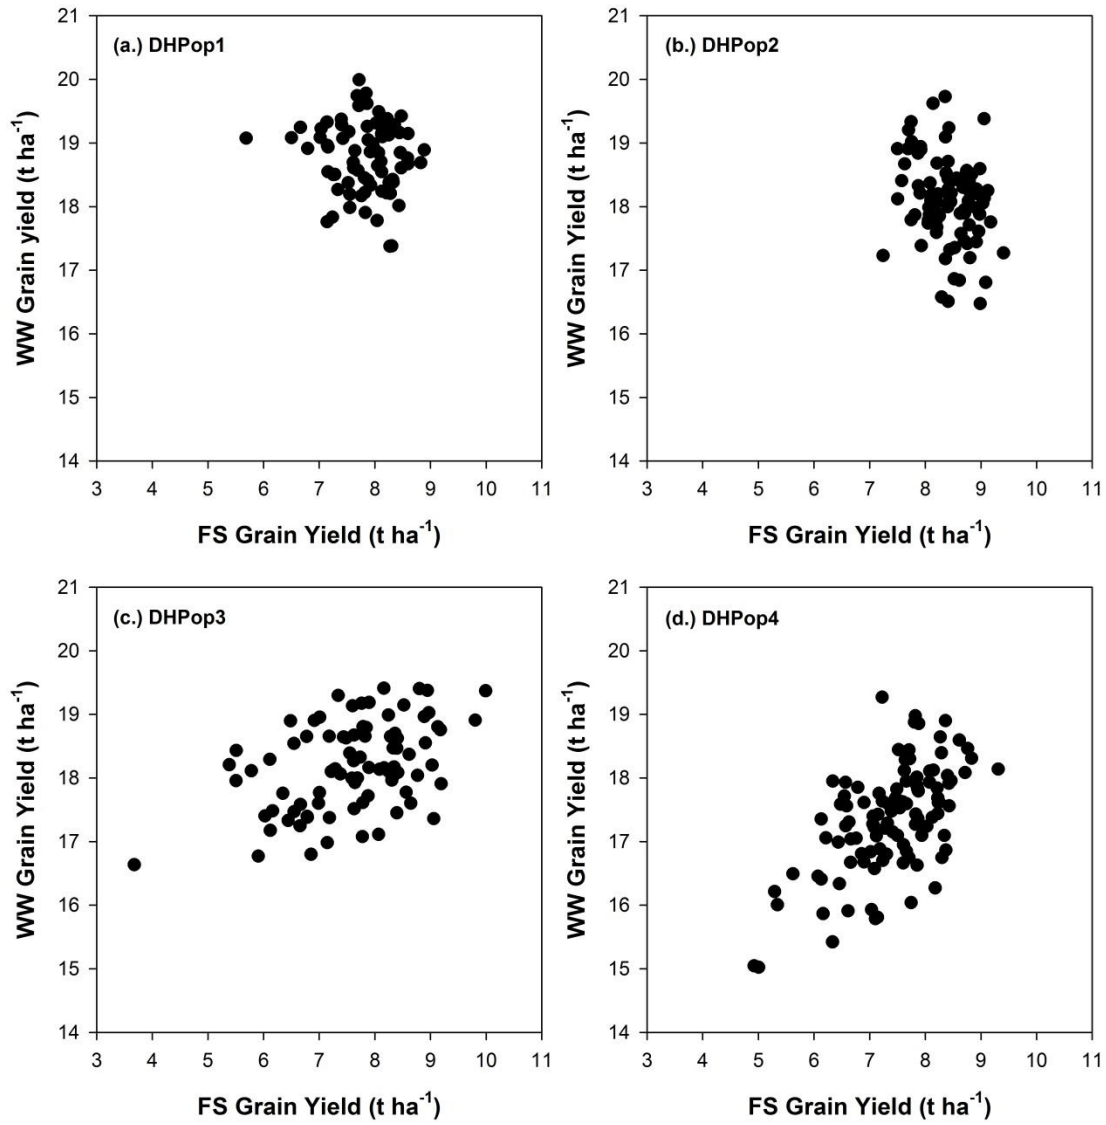

915

916 Figure 6

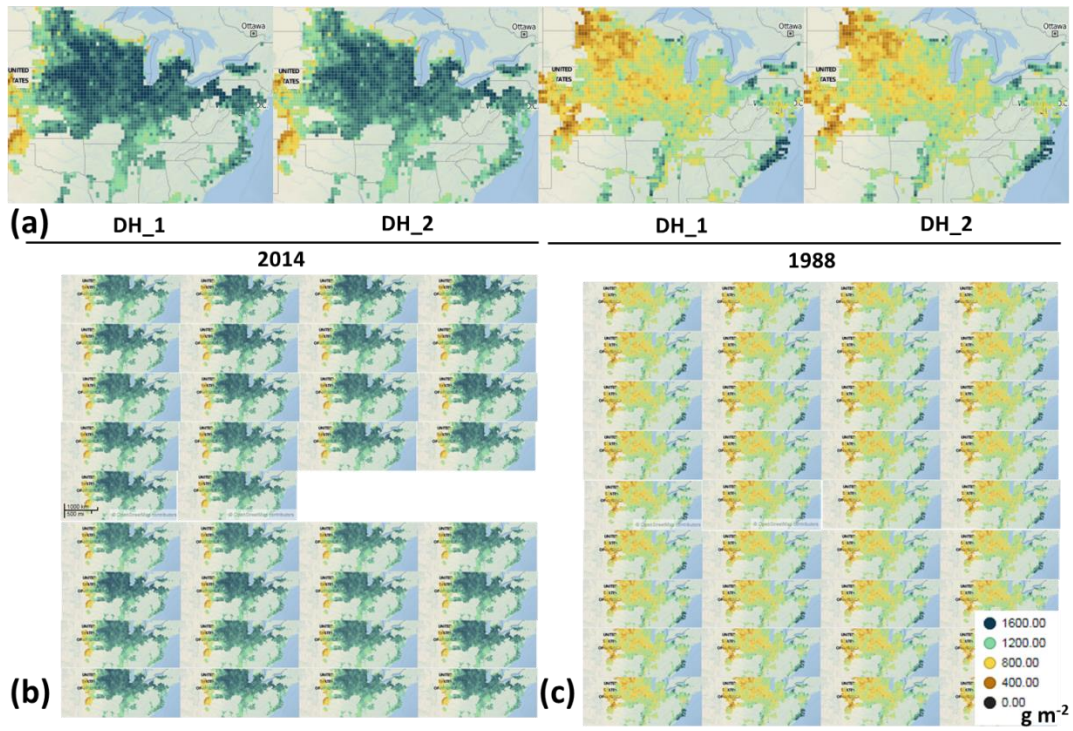

917
